# Supplementary material for: Feline Panleukopenia Virus in Dogs from Italy and Egypt
Source: PubMed Central journal article supplement (PMC9423925; doi:10.3201/eid2809.220388), 2022-09
Supplement: 22-0388-Techapp-s1.pdf [file 22-0388-Techapp-s1.pdf]

# Feline Panleukopenia Virus in Dogs from Italy and Egypt

## Appendix

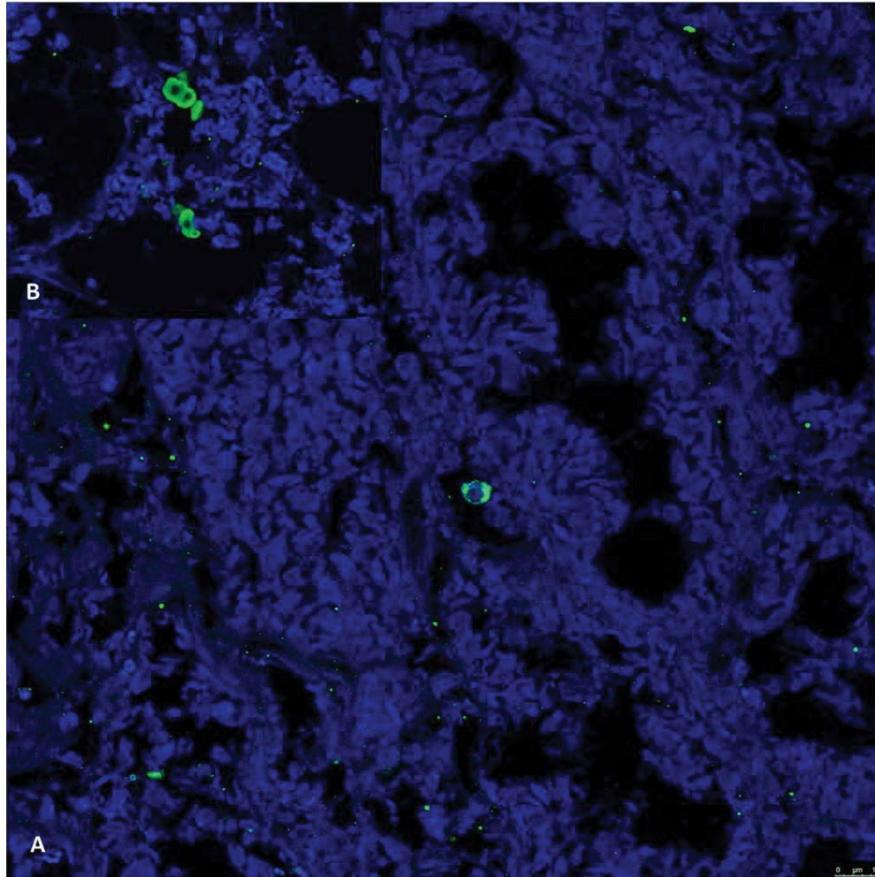

**Appendix Figure 1.** Immunofluorescence analyses of feline panleukopenia virus in small intestines of dogs from Italy. We prepared 3  $\mu\text{m}$ -thick sections of formalin-fixed, paraffin-embedded samples of small intestine from 3 adult dogs in Italy (case series B) for immunofluorescence analyses. The dogs had severe gastrointestinal symptoms and died. Canine parvovirus (CPV) and feline panleukopenia virus are antigenically similar variants of *Carnivore protoparvovirus 1*. Therefore, we used an anti-CPV antibody (1:50 dilution, rabbit polyclonal antibody) and a fluorescein isothiocyanate-conjugated goat anti-rabbit IgG secondary antibody (1:100, ThermoFisher Scientific, <https://www.thermofisher.com>) to detect *Carnivore protoparvovirus 1* antigens. A) and B) Representative images of parvoviral antigens detected in epithelial cells of atrophic villi of the small intestine of the 3 dogs; control sections of dog intestinal tissues were negative. Scale bar indicates 10  $\mu\text{m}$ .

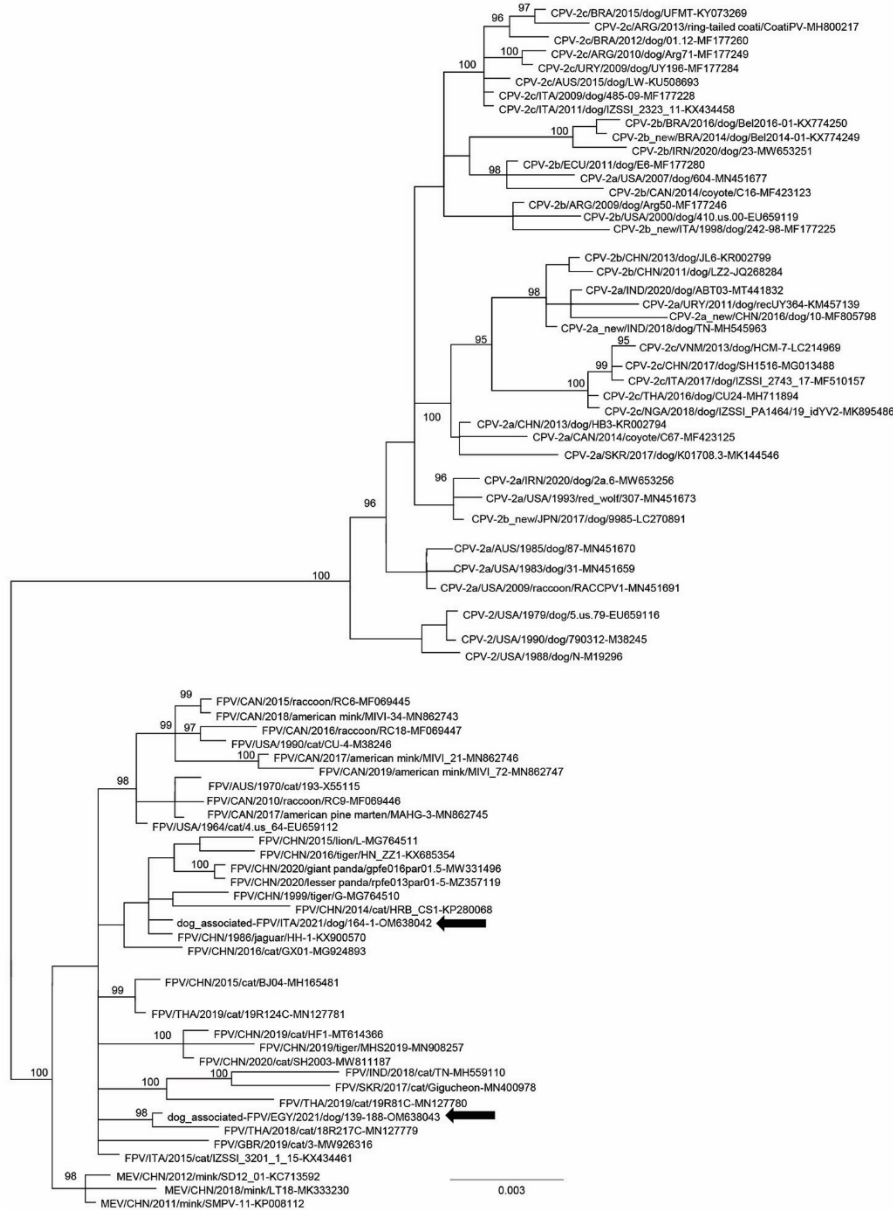

**Appendix Figure 2.** Phylogenetic differences for feline panleukopenia virus in dogs from Italy and Egypt. Bayesian phylogenetic tree based on ORF2 of *Carnivore protoparvovirus 1*. We aligned a 1,755 nucleotide sequence of ORF2 from the dog-associated FPV strains identified in this study with cognate sequences of *Carnivore protoparvovirus 1* strains retrieved from GenBank. Posterior output for the tree was derived by using a general time-reversible model, proportion of invariable sites, gamma distribution of rate variation across sites, and subsampling frequency of 1,000. Posterior probability values >95% are indicated at the tree nodes. Black arrows indicate the dog-associated FPV strains ITA/2021/164–1 (GenBank accession no. OM638042) and EGY/2021/139–188 (GenBank accession no. OM638043) identified in this study. Scale bar indicates nucleotide substitutions per site. CPV, canine parvovirus; FPV, feline panleukopenia virus; ORF2, open reading frame 2.
